# Supplementary material
Source: PubMed Central journal article supplement (PMC9208333)
Supplement: Supp_Fig1-2.pdf [file Supp_Fig1-2.pdf]

## Supplementary Data

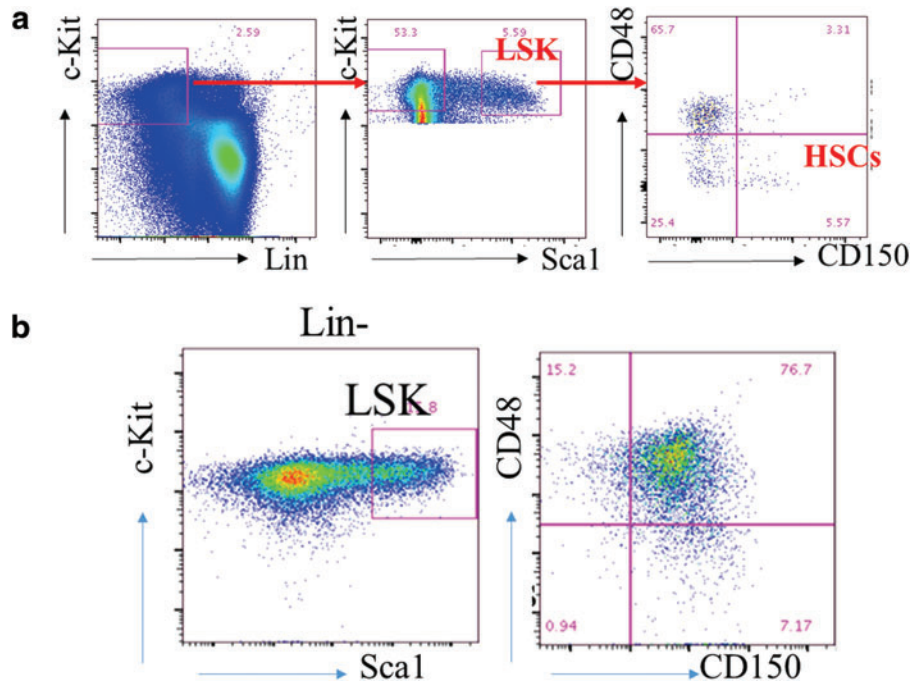

**SUPPLEMENTARY FIG. S1.** Flow cytometry strategy for HSC sorting (a) and analysis (b). HSC, hematopoietic stem cell.

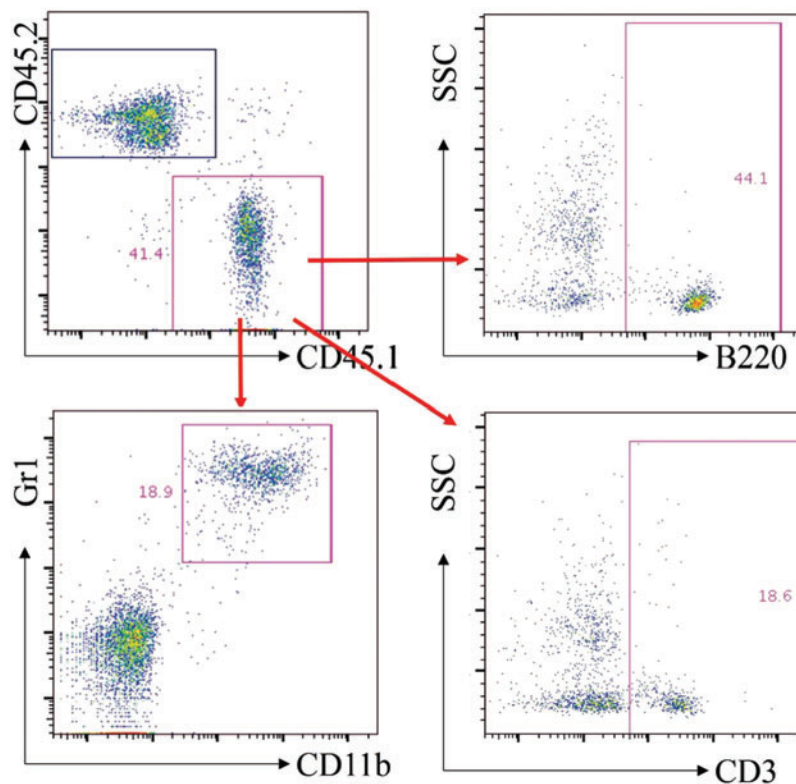

**SUPPLEMENTARY FIG. S2.** Flow cytometry strategy for hematopoietic engraftment analysis (associated with Fig. 1).
