# Supplementary material
Source: PubMed Central journal article supplement (PMC9208333)
Supplement: Supp_Fig3.pdf [file Supp_Fig3.pdf]

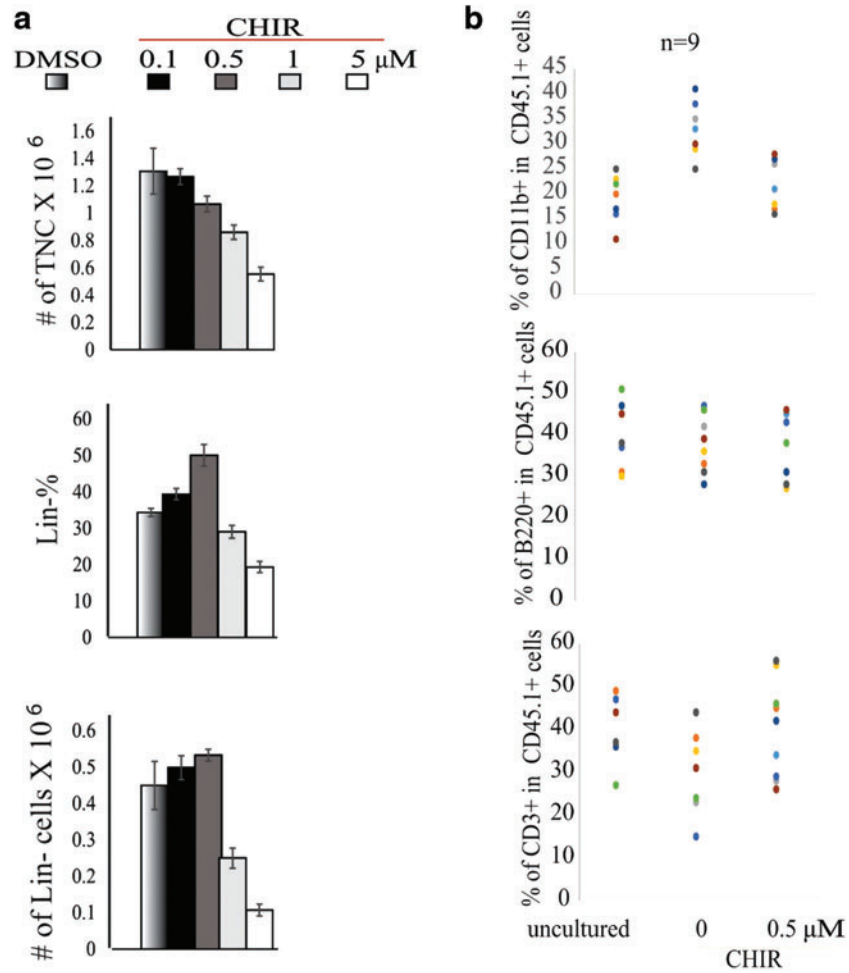

**SUPPLEMENTARY FIG. S3.** (a) HSCs were cultured as described in Fig. 1D (associated with Fig. 1). TNCs, percentages, and total numbers of Lin<sup>-</sup> cells were counted on day 9 of culturing. (b) The cultured stem cells were transplanted into recipient mice as described in Fig. 1E. Percentages of CD11b<sup>+</sup> myeloid cells, B220<sup>+</sup> B lymphocytes, and CD3<sup>+</sup> T lymphocytes in CD45.1<sup>+</sup> cells were analyzed 4 months after transplantation.
